# Supplementary material for: Lowering the Schottky barrier height of G/WSSe van der Waals heterostructures by changing the interlayer coupling and applying external biaxial strain
Source: Royal Society of Chemistry journal article supplement (doi:10.1039/d0cp04474a), 2020-01-01
Supplement: d0cp04474a1.pdf [file d0cp04474a1.pdf]

**Lowering the Schottky barrier height of G/WSSe van der Waals heterostructures by  
changing the interlayer coupling and applying external biaxial strain**

W.X. Zhang,<sup>1</sup> Y. Yin,<sup>1</sup> C. He<sup>2\*</sup>

<sup>1</sup> School of Materials Science and Engineering, Chang'an University, Xi'an 710064, China;

<sup>2</sup> State Key Laboratory for Mechanical Behavior of Materials, School of Materials Science  
and Engineering, Xi'an Jiaotong University, Xi'an 710049, China.

---

\* Corresponding Author: hecheng@mail.xjtu.edu.cn (C. He)

Table S1  $\Phi_{\text{TB}}$ ,  $W_{\text{TB}}$  and  $C$  values of G/SWSe heterostructure at different interlayer distances.

| interlayer distance<br>of G/SWSe | $\Phi_{\text{TB}}$ | $W_{\text{TB}}$ | $C$    |
|----------------------------------|--------------------|-----------------|--------|
| 2.5 Å                            | 7.63               | 1.33            | 13.58  |
| 2.7 Å                            | 8.55               | 1.50            | 19.19  |
| 2.9 Å                            | 8.96               | 1.71            | 26.31  |
| 3.1 Å                            | 9.56               | 1.91            | 34.77  |
| 3.3 Å                            | 9.96               | 2.12            | 44.77  |
| 3.5 Å                            | 10.12              | 2.29            | 52.99  |
| 3.7 Å                            | 10.29              | 2.50            | 64.31  |
| 3.9 Å                            | 10.29              | 2.70            | 74.72  |
| 4.1 Å                            | 10.38              | 2.85            | 84.02  |
| 4.3 Å                            | 10.54              | 3.10            | 101.22 |
| 4.5 Å                            | 10.46              | 3.28            | 112.70 |

Table S2  $\Phi_{\text{TB}}$ ,  $W_{\text{TB}}$  and  $C$  values of G/SWSe heterostructure under different external biaxial strains.

| strains of G/SWSe | $\Phi_{\text{TB}}$ | $W_{\text{TB}}$ | $C$   |
|-------------------|--------------------|-----------------|-------|
| -8%               | 9.74               | 2.18            | 46.20 |
| -6%               | 9.90               | 2.24            | 49.86 |
| -4%               | 9.98               | 2.28            | 51.64 |
| -2%               | 10.06              | 2.28            | 52.09 |
| 0%                | 10.06              | 2.24            | 50.68 |
| 2%                | 10.06              | 2.34            | 55.15 |
| 4%                | 10.06              | 2.38            | 56.81 |
| 6%                | 10.06              | 2.34            | 55.15 |
| 8%                | 10.06              | 2.38            | 56.81 |

Table S3  $\Phi_{\text{TB}}$ ,  $W_{\text{TB}}$  and  $C$  values of G/SeWS heterostructure at different interlayer distances.

| interlayer distance<br>of G/SeWS | $\Phi_{\text{TB}}$ | $W_{\text{TB}}$ | $C$    |
|----------------------------------|--------------------|-----------------|--------|
| 2.5 Å                            | 6.8                | 1.22            | 10.14  |
| 2.7 Å                            | 7.56               | 1.49            | 16.72  |
| 2.9 Å                            | 8.13               | 1.63            | 21.55  |
| 3.1 Å                            | 8.81               | 1.89            | 31.60  |
| 3.3 Å                            | 9.13               | 2.07            | 38.95  |
| 3.5 Å                            | 9.38               | 2.30            | 49.55  |
| 3.7 Å                            | 9.55               | 2.47            | 58.37  |
| 3.9 Å                            | 9.71               | 2.65            | 68.06  |
| 4.1 Å                            | 9.88               | 2.88            | 81.92  |
| 4.3 Å                            | 10.05              | 3.09            | 95.81  |
| 4.5 Å                            | 9.96               | 3.31            | 109.35 |

Table S4  $\Phi_{\text{TB}}$ ,  $W_{\text{TB}}$  and  $C$  values of G/SeWS heterostructure under different external biaxial strains.

| strains of G/SeWS | $\Phi_{\text{TB}}$ | $W_{\text{TB}}$ | $C$   |
|-------------------|--------------------|-----------------|-------|
| -8%               | 9.08               | 2.11            | 40.53 |
| -6%               | 9.16               | 2.14            | 42.07 |
| -4%               | 9.16               | 2.14            | 42.08 |
| -2%               | 9.25               | 2.18            | 43.87 |
| 0%                | 9.32               | 2.21            | 45.50 |
| 2%                | 9.57               | 2.24            | 48.21 |
| 4%                | 9.57               | 2.28            | 49.55 |
| 6%                | 9.41               | 2.31            | 50.21 |
| 8%                | 9.57               | 2.34            | 52.46 |

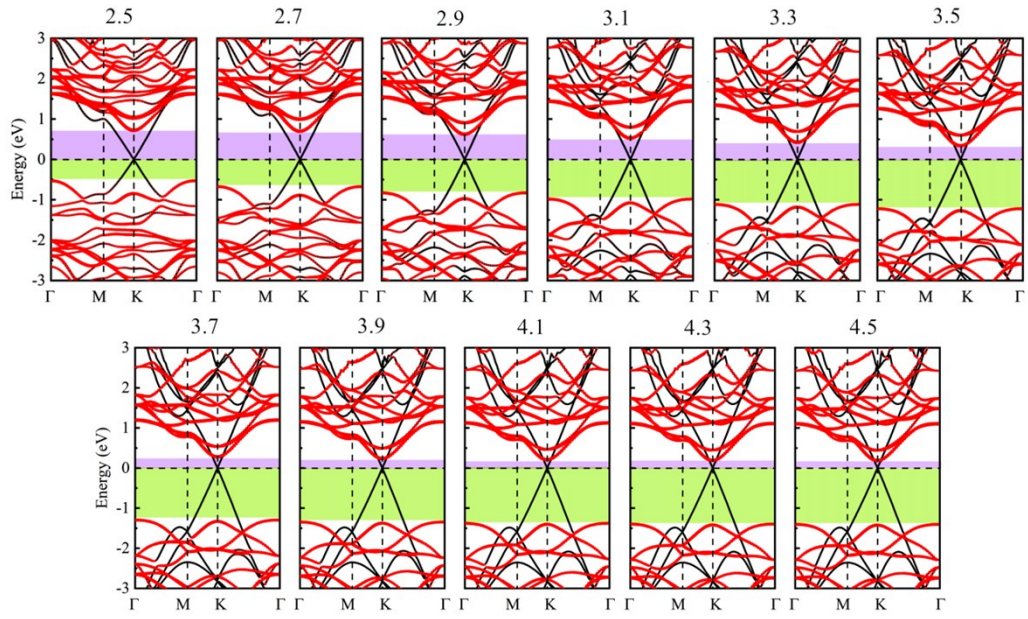

Fig. S1. Band structures of the G/SWSe heterostructure with different interlayer distances from 2.5 Å to 4.5 Å.

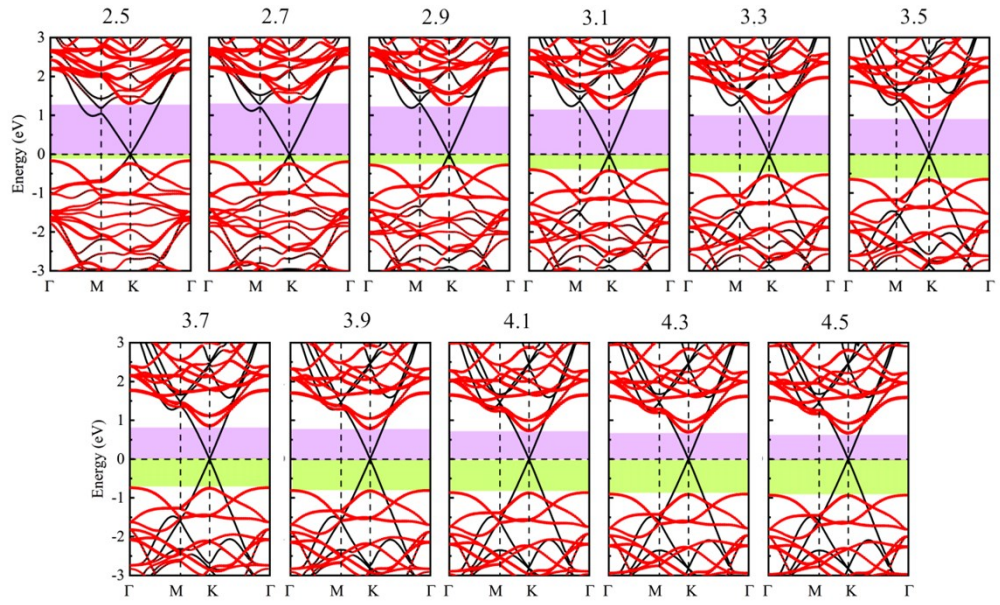

Fig. S2. Band structures of the G/SeWS heterostructure with different interlayer distances from 2.5 Å to 4.5 Å.

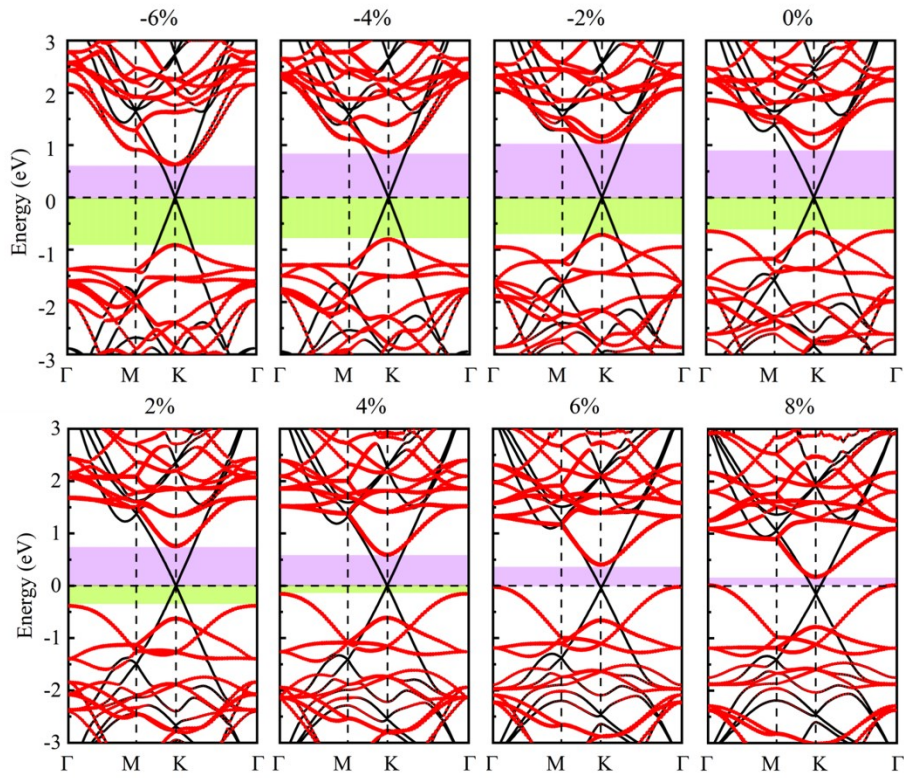

Fig. S3. Band structures of the G/SeWS heterostructure under external biaxial strains

from  $-6\%$  to  $+8\%$ .



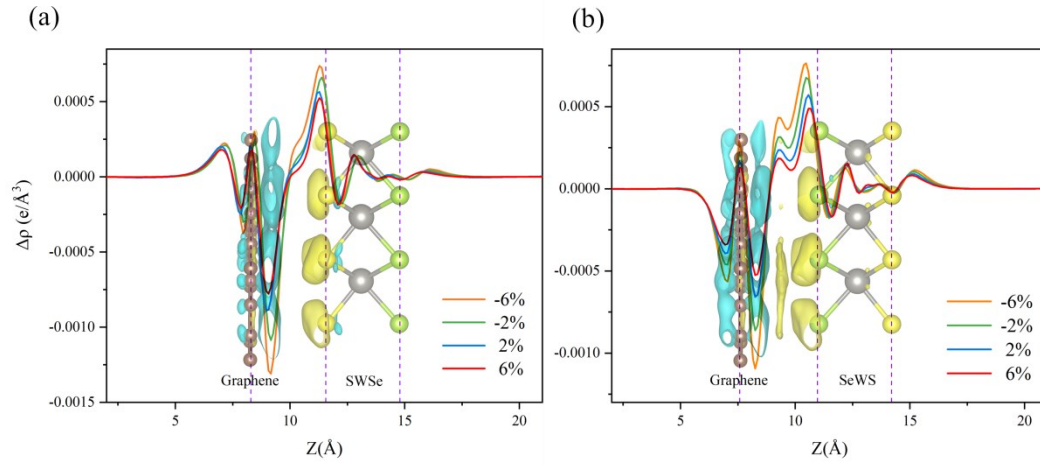

Fig. S4. Charge density difference with an isovalue of  $0.001 \text{ e}/\text{\AA}^3$  and the planar averaged charge density difference for (a) G/SWSe heterostructure and (b) G/SeWS heterostructure with the other relevant external biaxial strains.

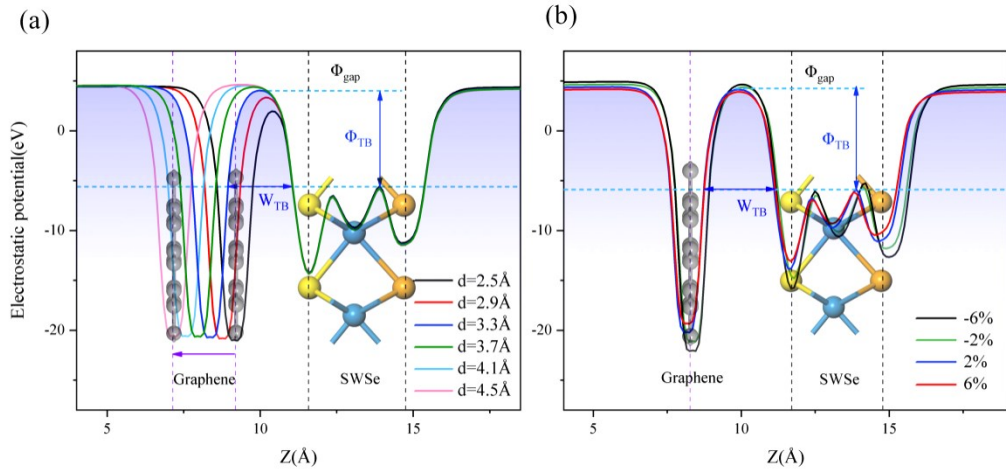

Fig. S5. Effective electrostatic potential profile of G/SWSe heterostructure with the other relevant (a) interlayer distance and (b) external biaxial strains.

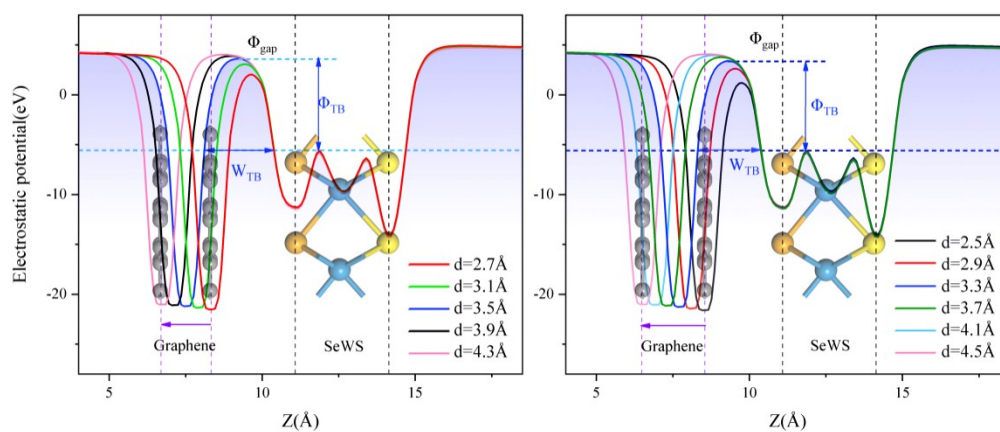

Fig. S6. Effective electrostatic potential profile of G/SeWS heterostructure with different interlayer distance.

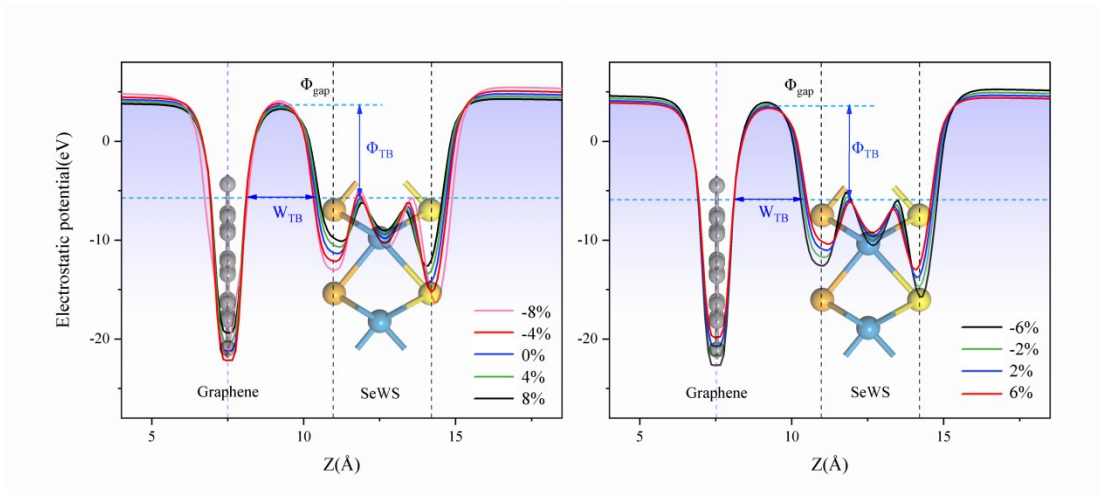

Fig. S7. Effective electrostatic potential profile of G/SeWS heterostructure with different external biaxial strains.
